# Supplementary material for: Insights into Transcriptomic Differences in Ovaries between Lambs and Adult Sheep after Superovulation Treatment
Source: MDPI journal article supplement (doi:10.3390/ani13040665), 2023-02-14
Supplement: s1 [file s1]

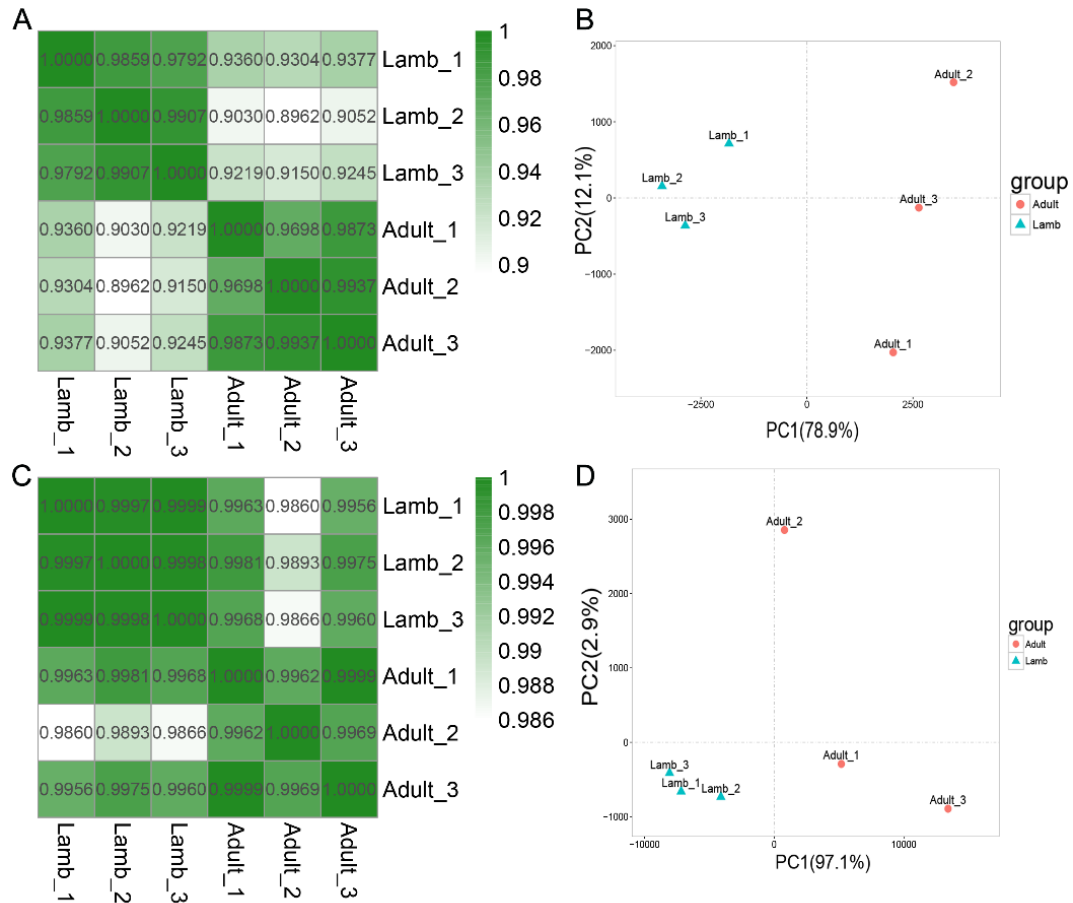

Figure S1. Biological repeats correlation analysis. A) and C) show the sample-to-sample Pearson's correlation results; the darker the cell, the higher correlation of the sample. B) and D) show the PCA results among all the biological repeats.
