# Supplementary material for: Insights into Transcriptomic Differences in Ovaries between Lambs and Adult Sheep after Superovulation Treatment
Source: Animals (Basel). 2023 Feb 14;13(4):665. doi: 10.3390/ani13040665 (PMC9951745; doi:10.3390/ani13040665)
Supplement: Supplementary file 1 [file animals-13-00665-s001.zip › Table S1.xlsx]

## Sheet: Table S1
Table S1: Fitting curve of correlation between qRT-PCR and RNA-seq gene expression results
Relative expression level calculated based on 2−ΔΔCT (Real-time PCR)
qRT-PCR	Lamb			Adult
FSHR	4.80117	4.25216	3.02101	1.20867	1.00309	1.0371
LHCGR	4.33582	4.80311	5.80111	1.00364	1.4341	0.877713
PTX3	0.413411	0.430614	0.42904	0.999637	1.60045	1.24378
BCL2	0.72434	0.510504	0.421246	0.881854	1.21454	0.996916
CASP3	5.82559	7.32167	2.92951	1.07001	1.6756	0.998314
CYP17A1	23.229	19.551	19.3111	0.516092	0.331725	1.0032
INHA	4.88699	7.70429	9.1204	1.00333	1.00481	0.899194
ESR1	0.506151	0.914569	1.26819	1.4	2.03	1.68754
					qCPR	FPKM
			lamb	FSHR	4.02478	5.93
				PTX3	0.424355	4.02333
				BCL2	0.55203	2.12667
				CASP3	5.35892	7.18667
				CYP17A1	20.697	167
				ESR1	0.896303	8.88667
			adult	FSHR	1.08295	1.49333
				PTX3	1.28129	20.1867
				BCL2	1.0311	5.47
				CASP3	1.24797	1.58333
				CYP17A1	0.617007	5.52333
				ESR1	1.70585	22.16
Sequencing data of candidate genes
RNA-seq
id	Adult_1_count	Adult_2_count	Adult_3_count	Lamb_1_count	Lamb_2_count	Lamb_3_count	Adult_1_fpkm	Adult_2_fpkm	Adult_3_fpkm	Lamb_1_fpkm	Lamb_2_fpkm	Lamb_3_fpkm	Adult_mean	Lamb_mean	log2(fc)	PValue	FDR	Symbol
ncbi_443299	89	33	64	372	258	225	2.24	0.72	1.52	6.47	6.32	5	1.49333	5.93	1.9895	7.00677e-08	4.62665e-07	FSHR
ncbi_101113228	940	749	734	7146	3539	3812	20.13	13.98	14.82	105.89	73.92	72.48	16.31	84.0967	2.36629	3.12839e-31	1.77404e-29	LHCGR
ncbi_100034672	794	1191	907	294	159	199	17.9	23.38	19.28	4.59	3.49	3.99	20.1867	4.02333	-2.32694	2.34181e-42	2.75291e-40	PTX3
ncbi_101114560	85	76	90	46	26	39	5.91	4.6	5.9	2.21	1.76	2.41	5.47	2.12667	-1.36295	2.25315e-05	9.97445e-05	BCL2A1
ncbi_114116869	35	99	116	371	442	407	0.72	1.77	2.26	5.27	8.86	7.43	1.58333	7.18667	2.18236	3.47356e-09	2.7544e-08	CASP3
ncbi_493968	266	81	128	8386	4194	4406	9.64	2.55	4.38	210.57	148.47	141.96	5.52333	167	4.91817	1.44955e-16	2.66495e-15	CYP17A1
ncbi_101118082	3058	2406	2529	26064	18462	14914	172.48	118.19	134.46	1016.87	1015.42	746.52	141.71	926.27	2.70849	1.42989e-49	2.58746e-47	INHA
ncbi_443228	1727	2951	2683	1206	883	1174	16.82	25.03	24.63	8.12	8.39	10.15	22.16	8.88667	-1.31824	2.62536e-14	3.77177e-13	ESR1
